# Supplementary material for: Nuclear Pyruvate Kinase M2 (PKM2) Contributes to Phosphoserine Aminotransferase 1 (PSAT1)-Mediated Cell Migration in EGFR-Activated Lung Cancer Cells
Source: MDPI journal article supplement (doi:10.3390/cancers13163938), 2021-08-04

Figure 1C

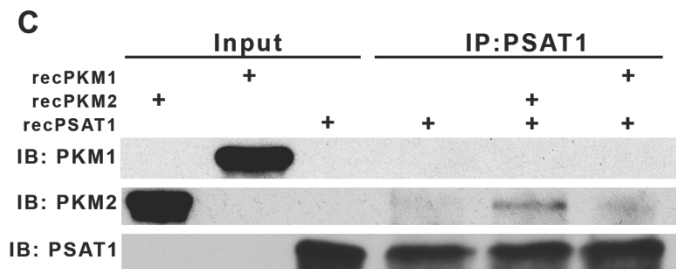

IB: PKM2

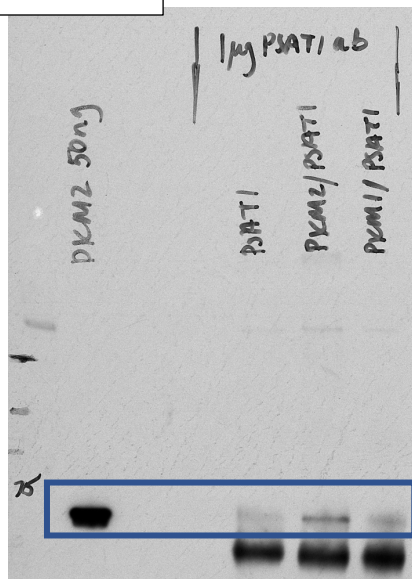

IB: PKM1

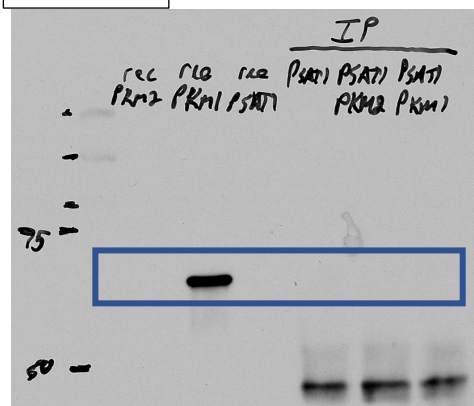

IB: PSAT1

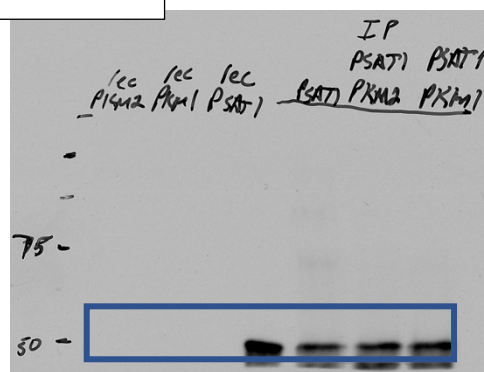

Figure 2B

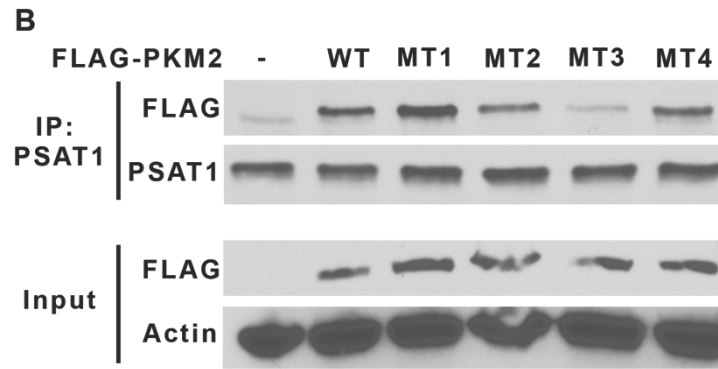

IP:PSAT1  
IB: FLAG

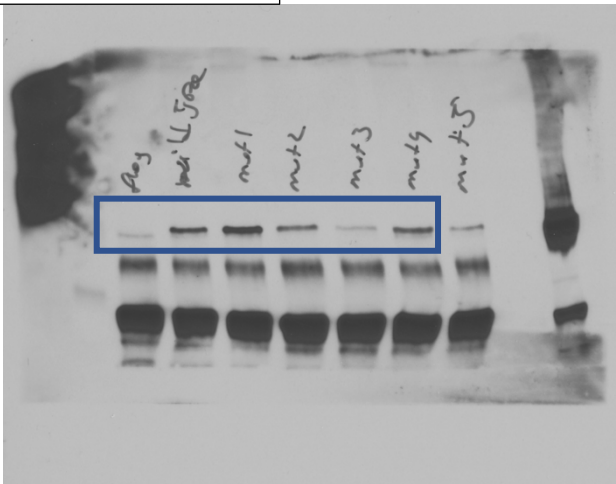

IP:PSAT1  
IB: PSAT1

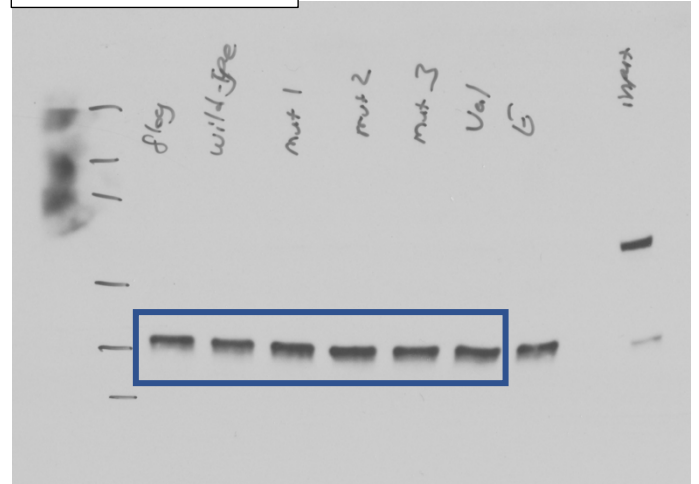

Input  
IB: FLAG

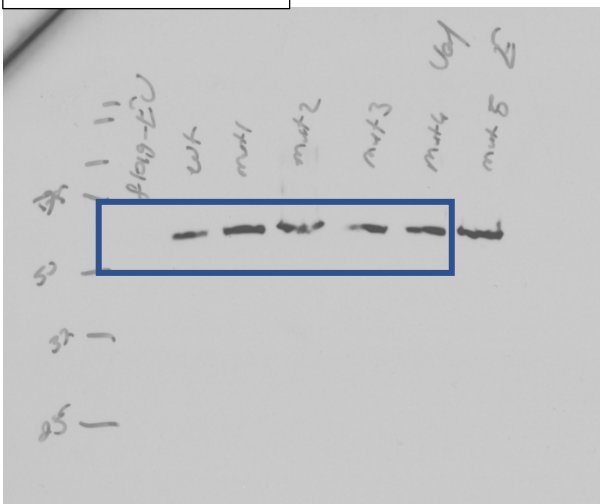

Input  
IB: Actin

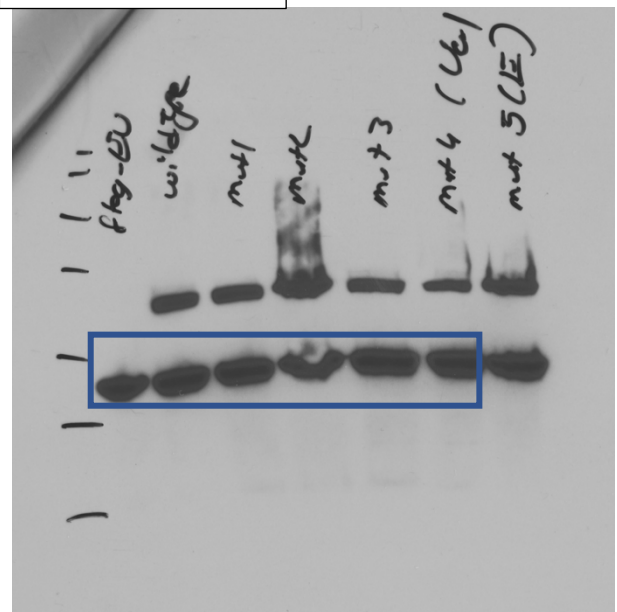

Figure 3A

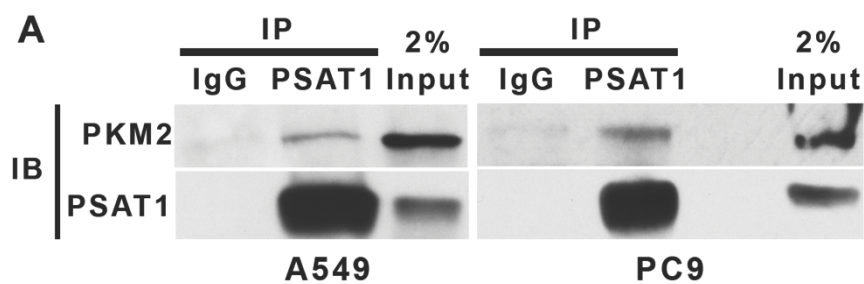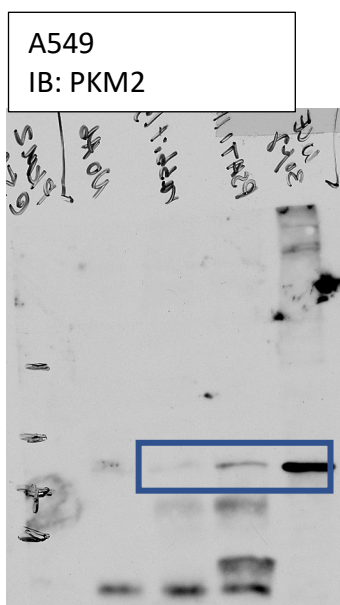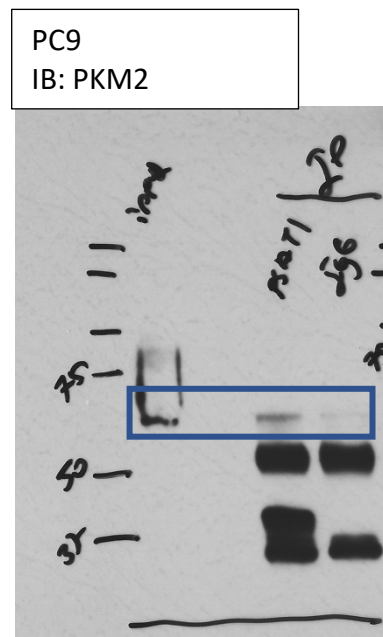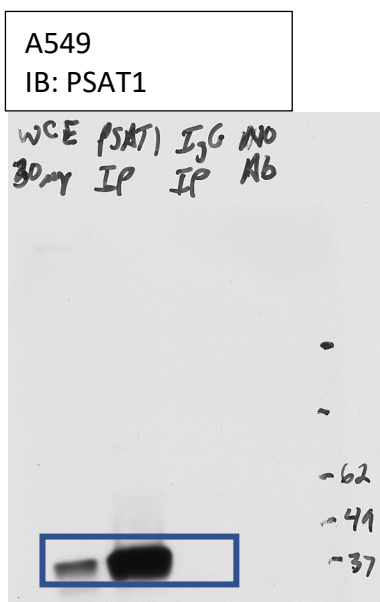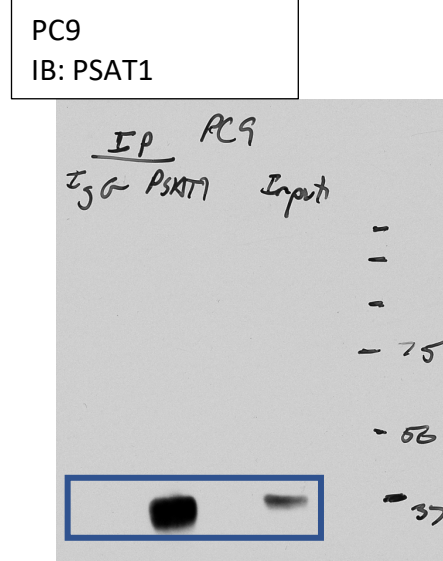

Figure 3B

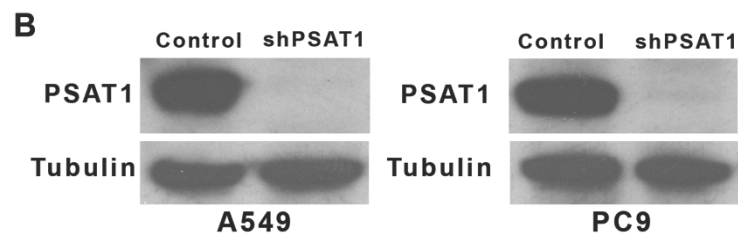

IB: PSAT1

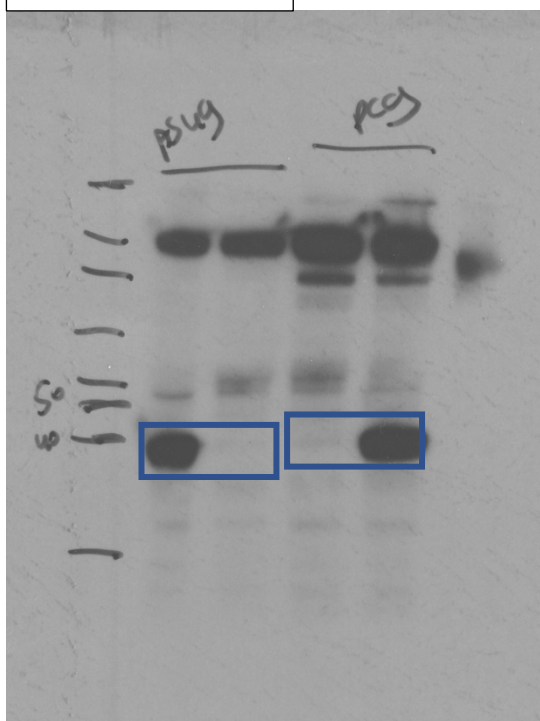

IB: Tubulin

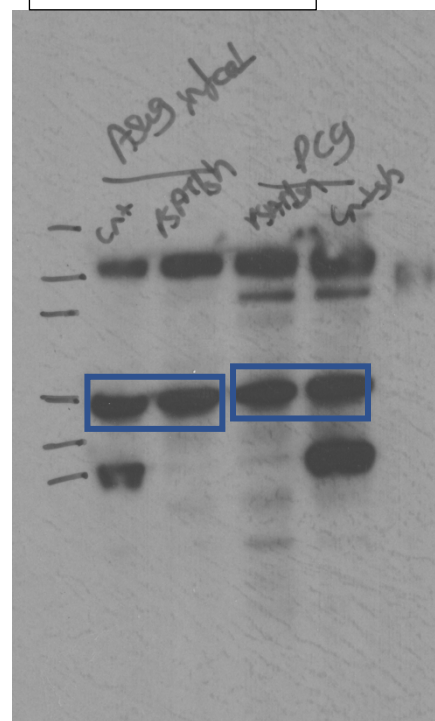



Figure 3D

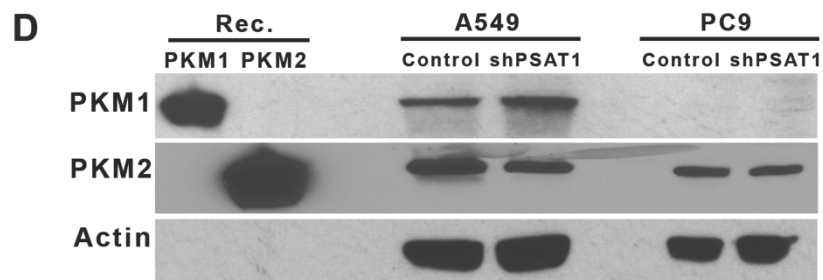

IB: PKM1

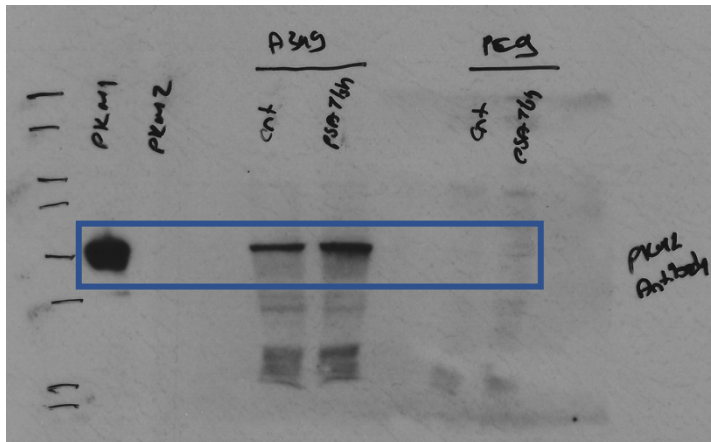

IB: PKM2

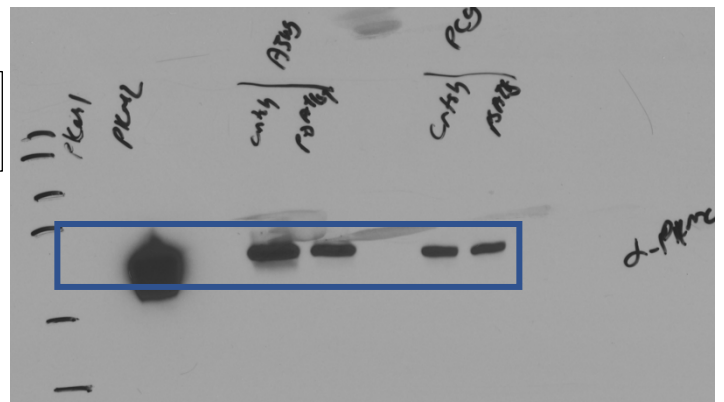

IB: Actin

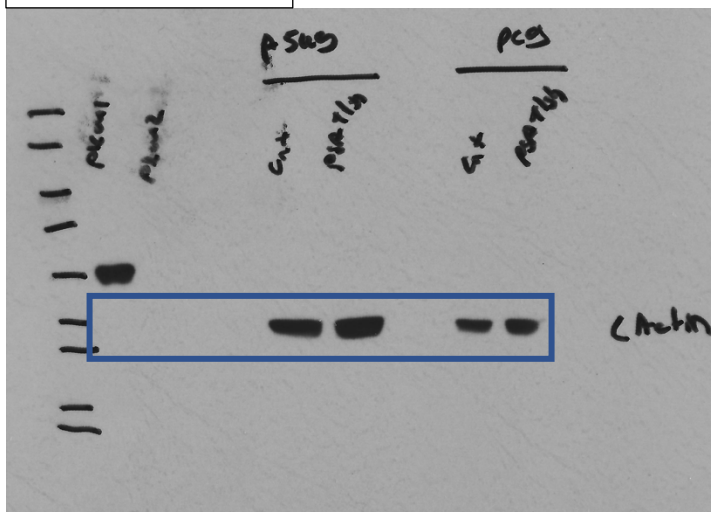

Figure 4A

A

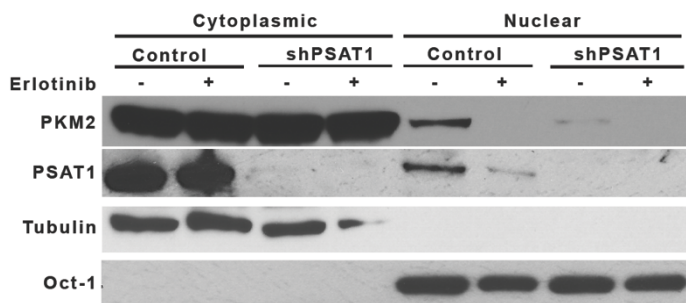

IB: PKM2

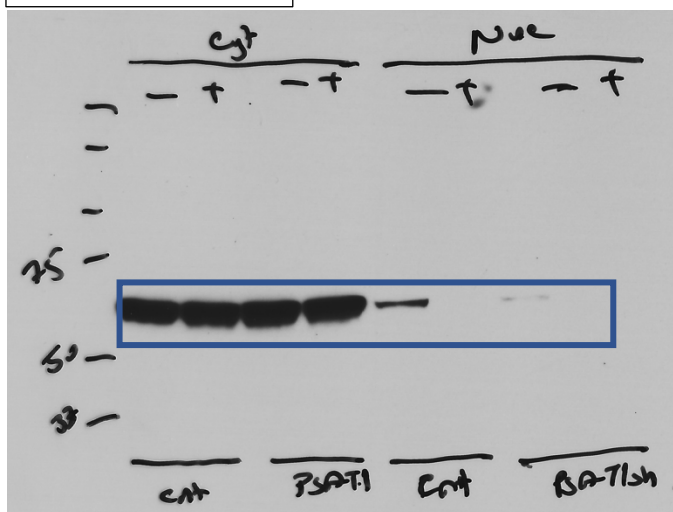

IB: PSAT1

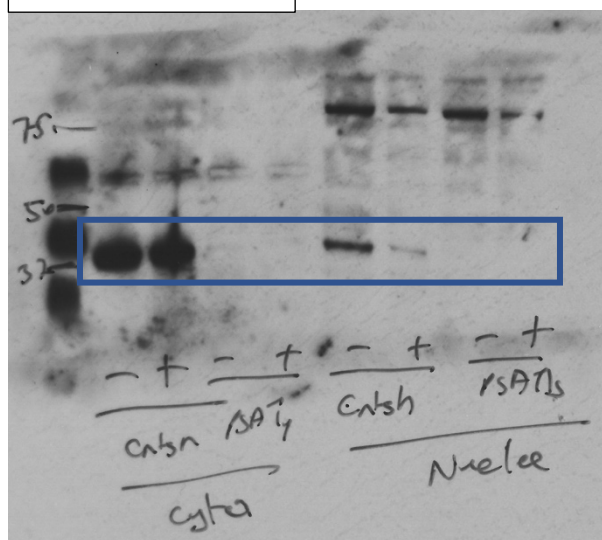

IB: Tubulin

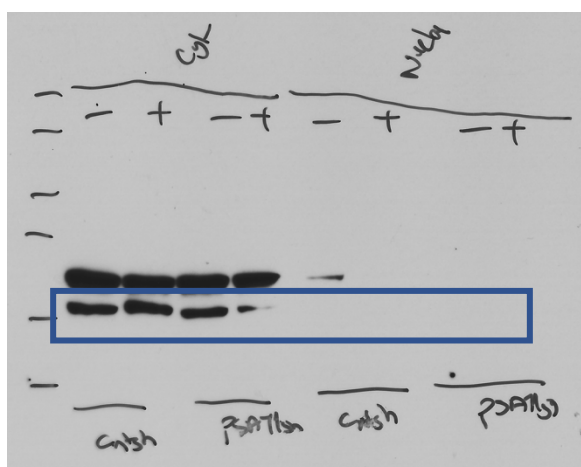

IB: Oct-1  
Membrane cut  
below 75kDa for  
Oct1-immunoblot

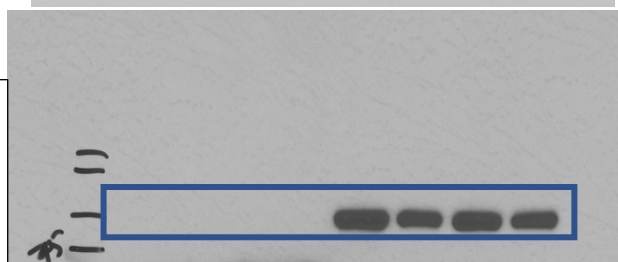

Figure 4C

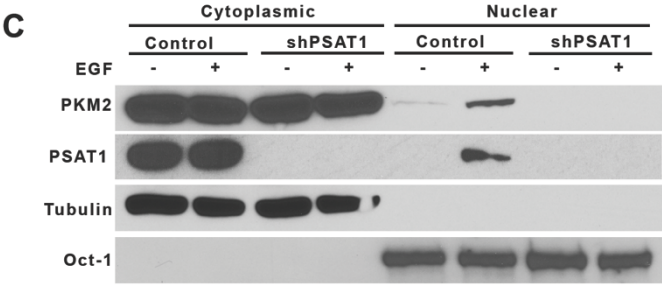

IB: PKM2

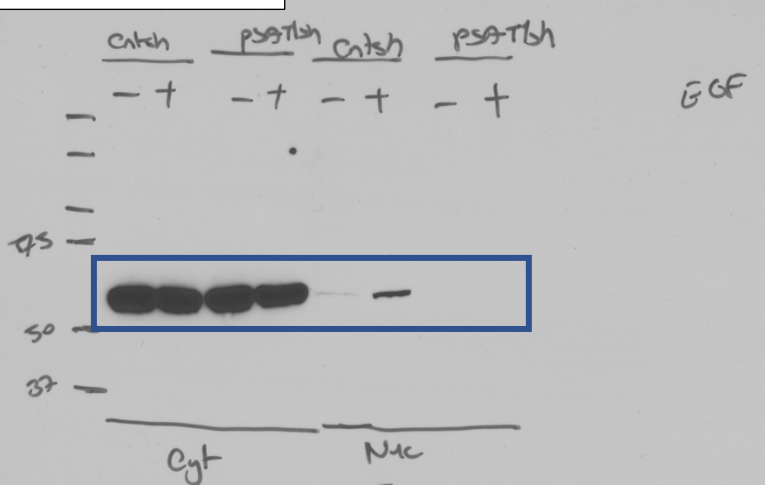

IB: PSAT1

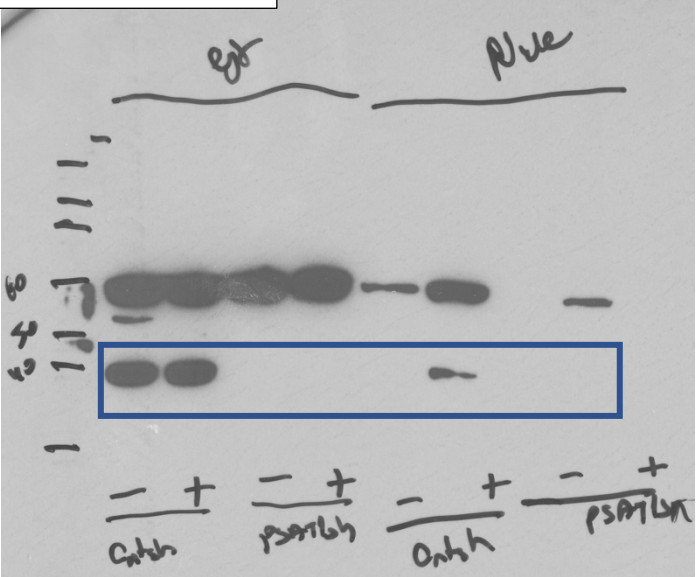

IB: Tubulin

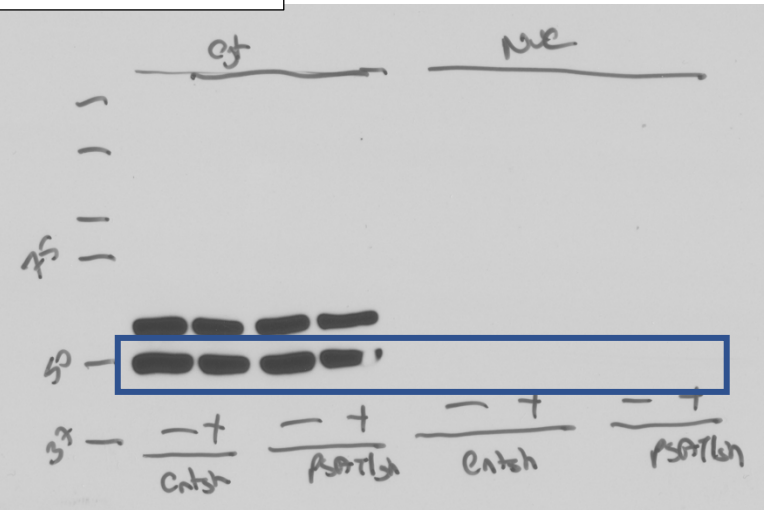

IB: Oct-1  
Membrane cut  
below 75kDa for  
Oct1-immunoblot

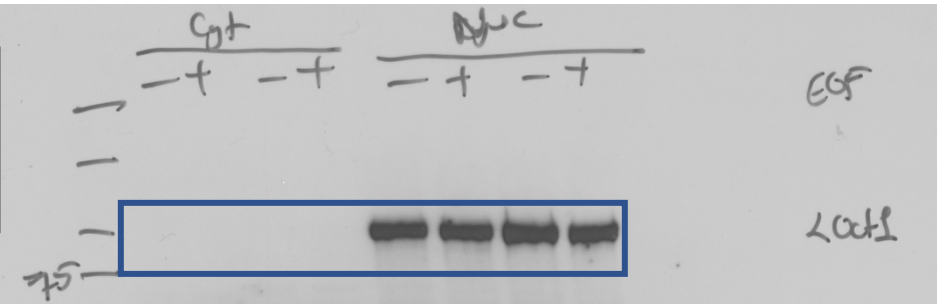

Figure 6A

A

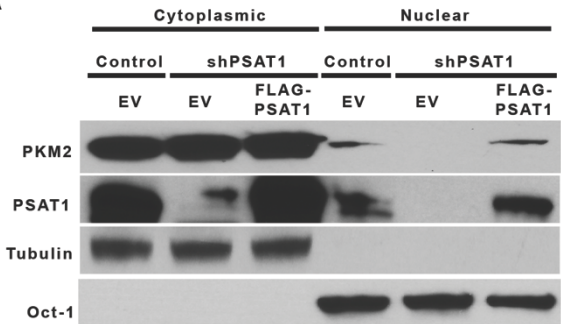

IB: PKM2

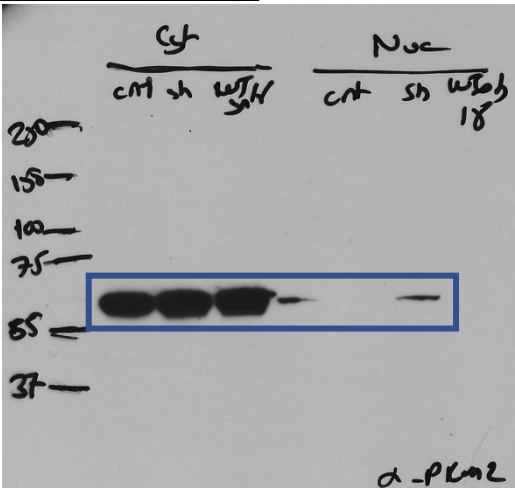

IB: PSAT1

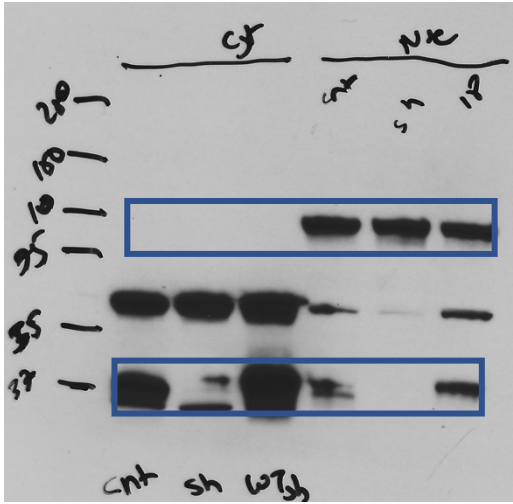

IB: Oct-1

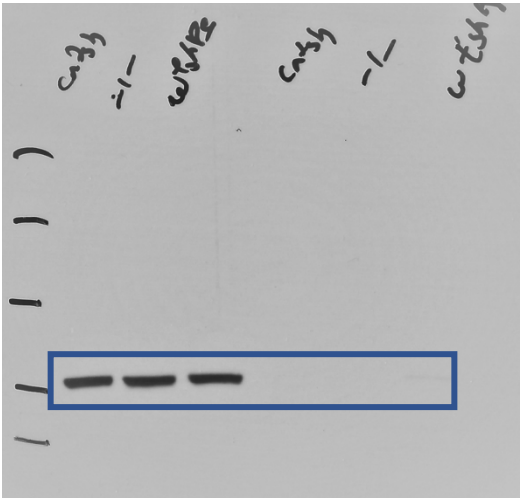

IB: Tubulin

Figure 7A

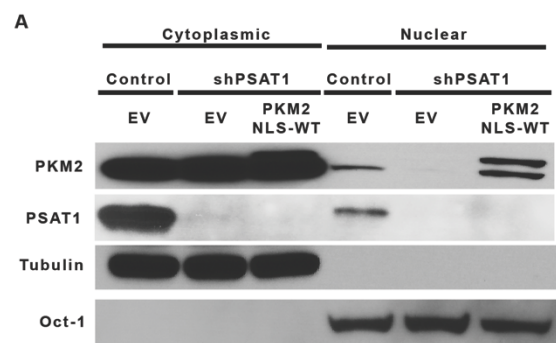

IB: PKM2

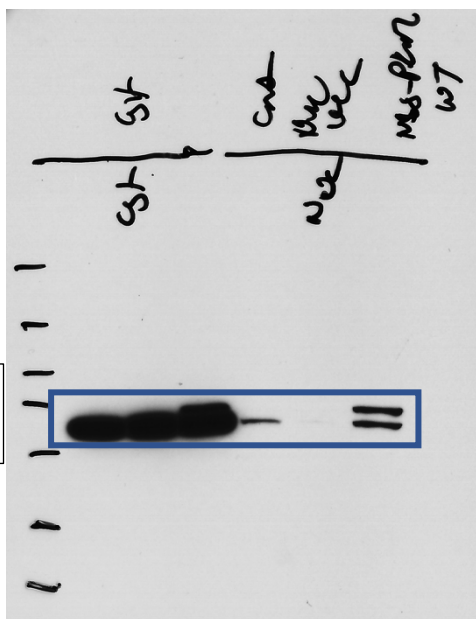

IB: Tubulin

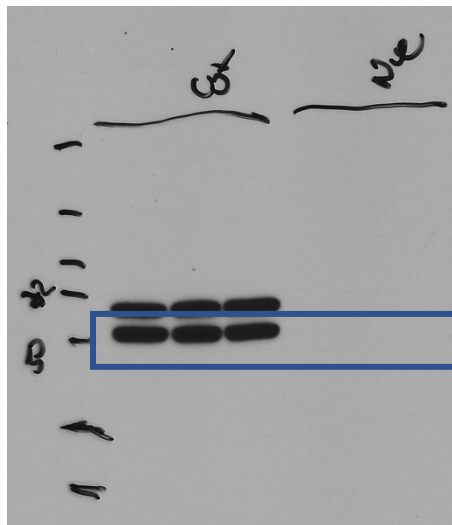

IB: Oct-1

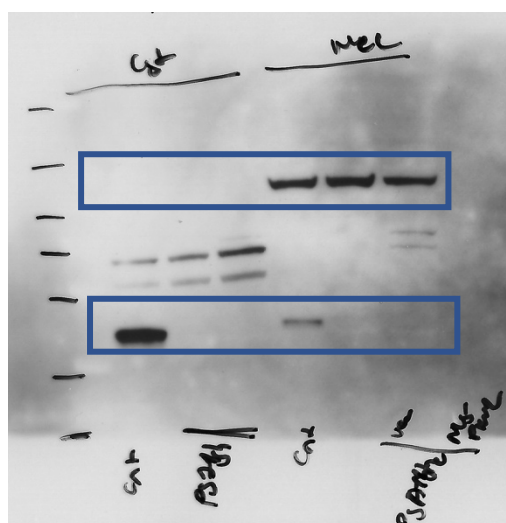

IB: PSAT1

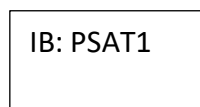



Figure 7C

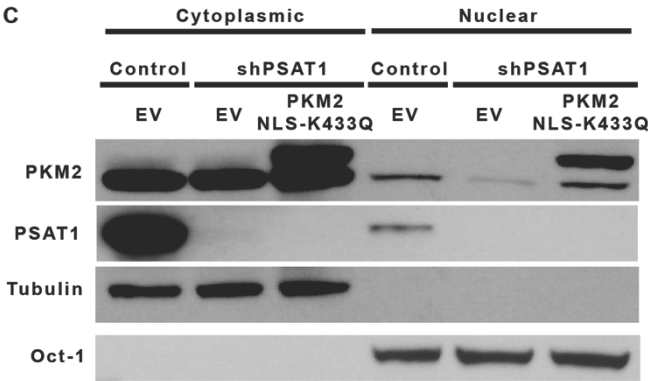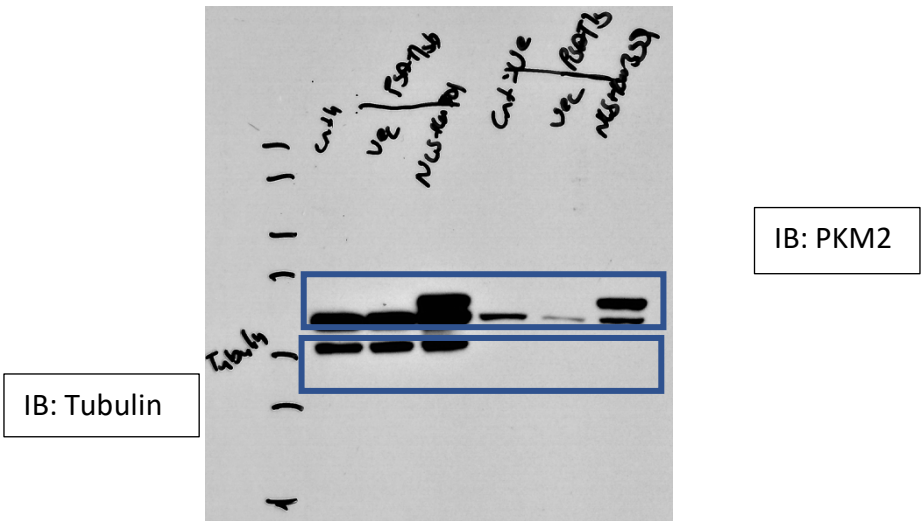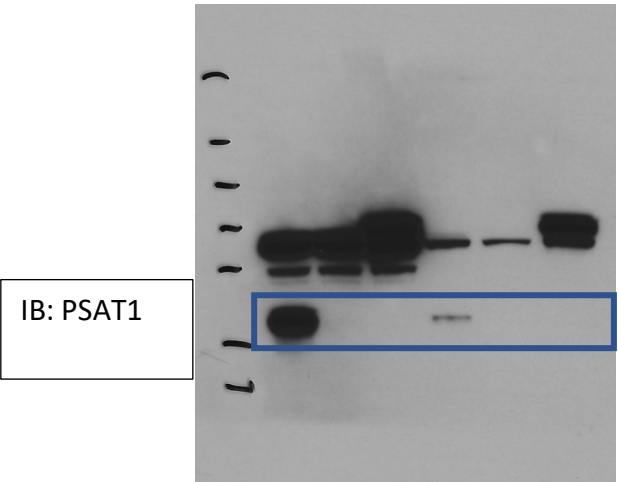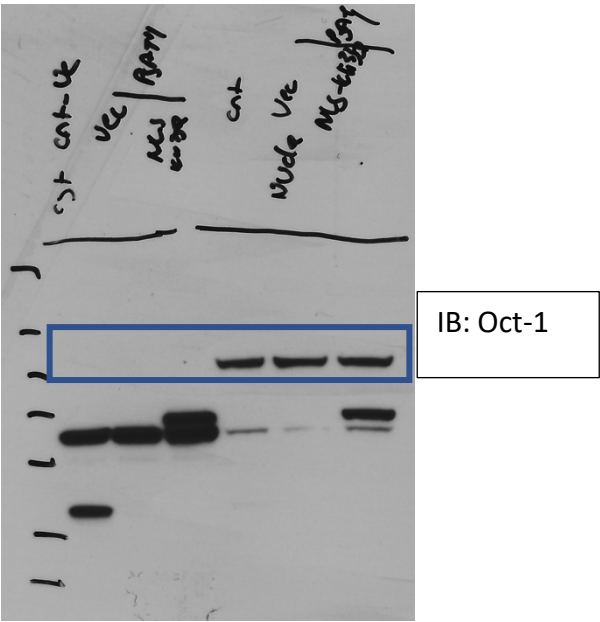

# Supplemental Figure 1A

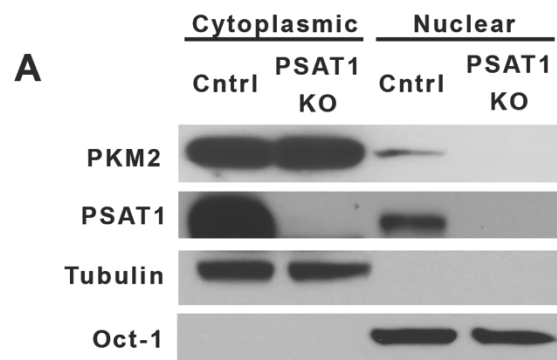

IB: PKM2

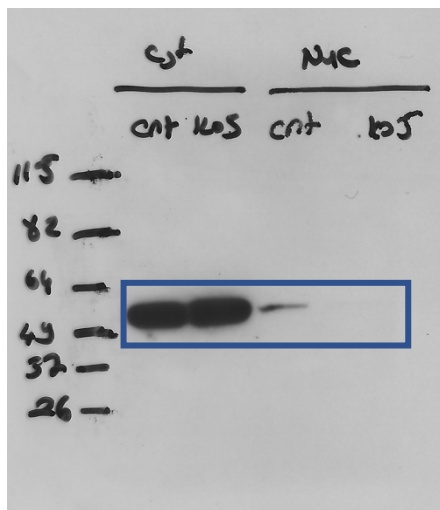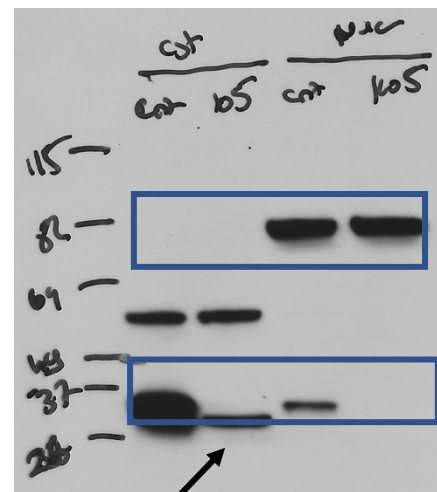

IB: Oct-1

IB: PSAT1

N.S.

IB: Tubulin

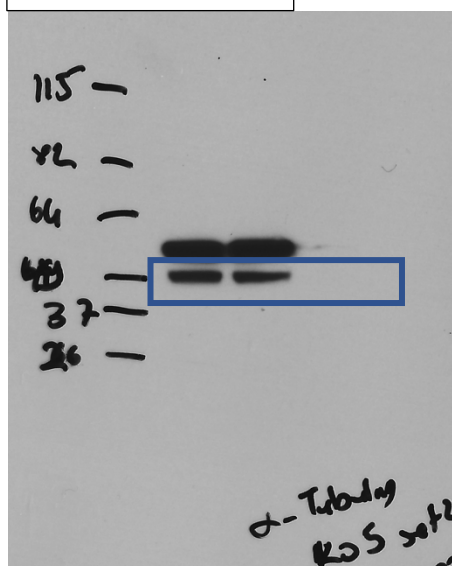

Supplemental Figure 2A

A

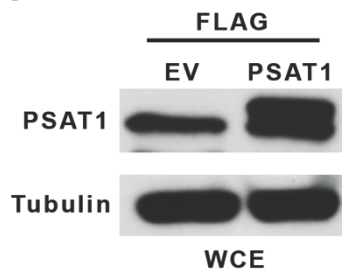

IB: Tubulin

IB: PSAT1

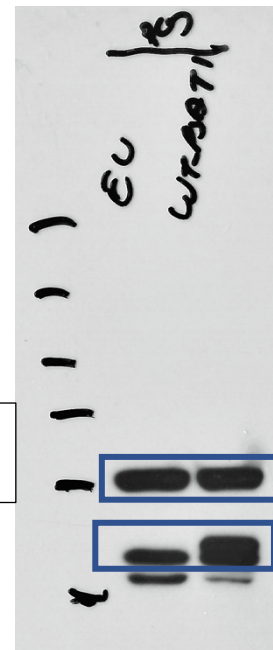

Supplemental Figure 2B

B

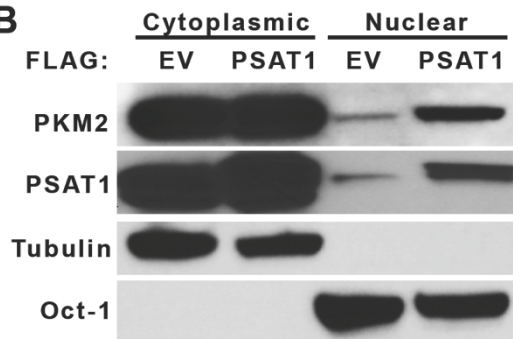

IB: PKM2

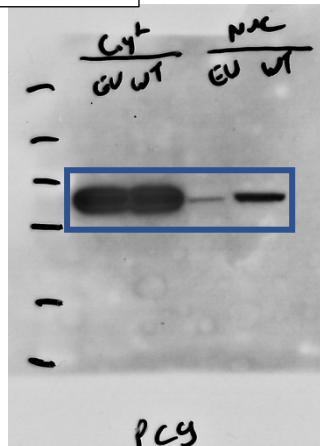

IB: Oct-1

IB: PSAT1

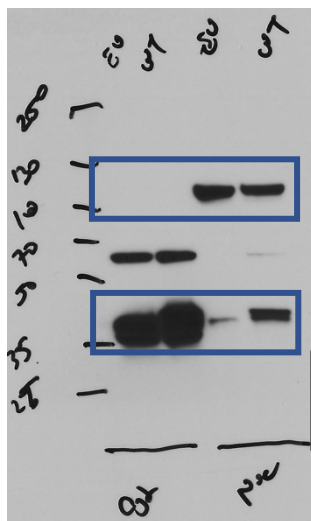

IB: Tubulin

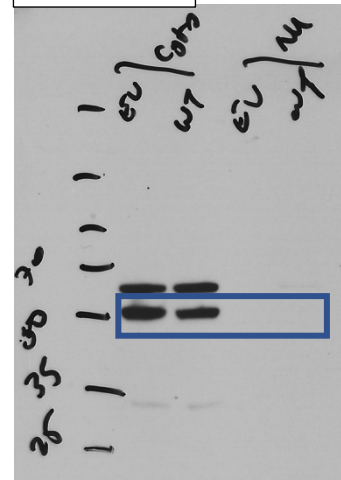

Supplement: s1 [file s1]
