# Supplementary material for: Nuclear Pyruvate Kinase M2 (PKM2) Contributes to Phosphoserine Aminotransferase 1 (PSAT1)-Mediated Cell Migration in EGFR-Activated Lung Cancer Cells
Source: MDPI journal article supplement (doi:10.3390/cancers13163938), 2021-08-04
Supplement: s1 [file s1]

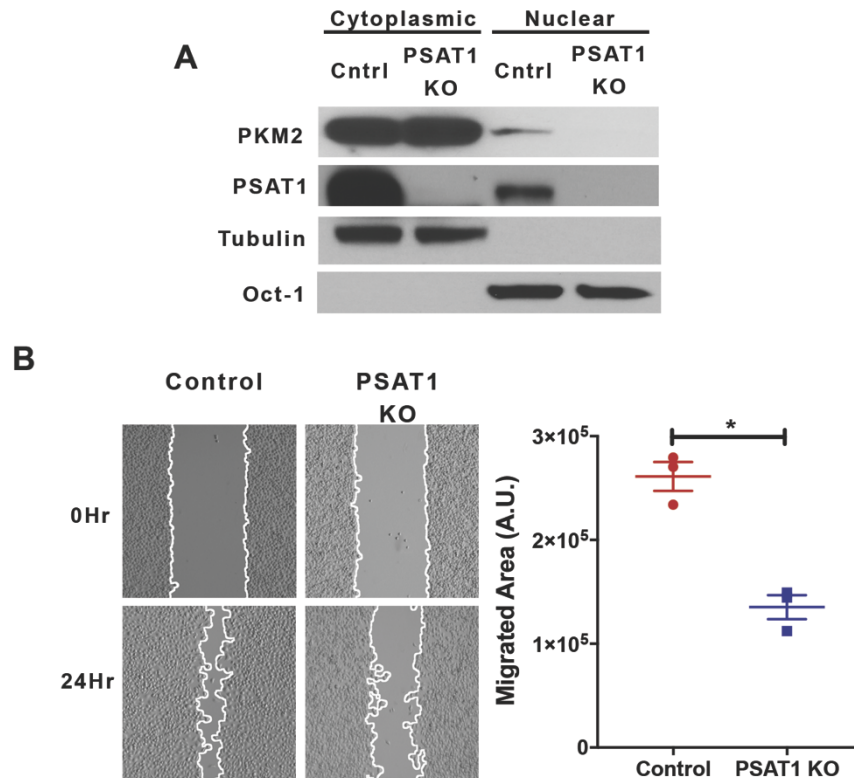

**Supplemental Figure S1. Genomic deletion of PSAT1 recapitulates the phenotype of shRNA-mediated PSAT1 silencing in PC9 cells.** A) Immunoblot analysis of PKM2 and PSAT1 localization after PSAT1 knockout. Cytoplasmic and nuclear fractions from Control and PSAT1 KO PC9 cells were analyzed using anti-PKM2 or anti-PSAT1 antibodies. Oct-1 and  $\alpha$ -tubulin served as loading controls for nuclear and cytoplasmic compartments, respectively. Shown is representative image from three independent experiments. B) Wound healing assay of serum-starved Control and PSAT1 KO PC9. Shown are representative images at 0 hr and 24 hr with migrating cells demarcated by continuous white lines. Data is presented as mean  $\pm$  SE migrated area after 24 hours from three independent experiments. Statistical significance was determined by paired t-test analysis. \*,  $p < 0.05$  and A.U.: arbitrary unit.

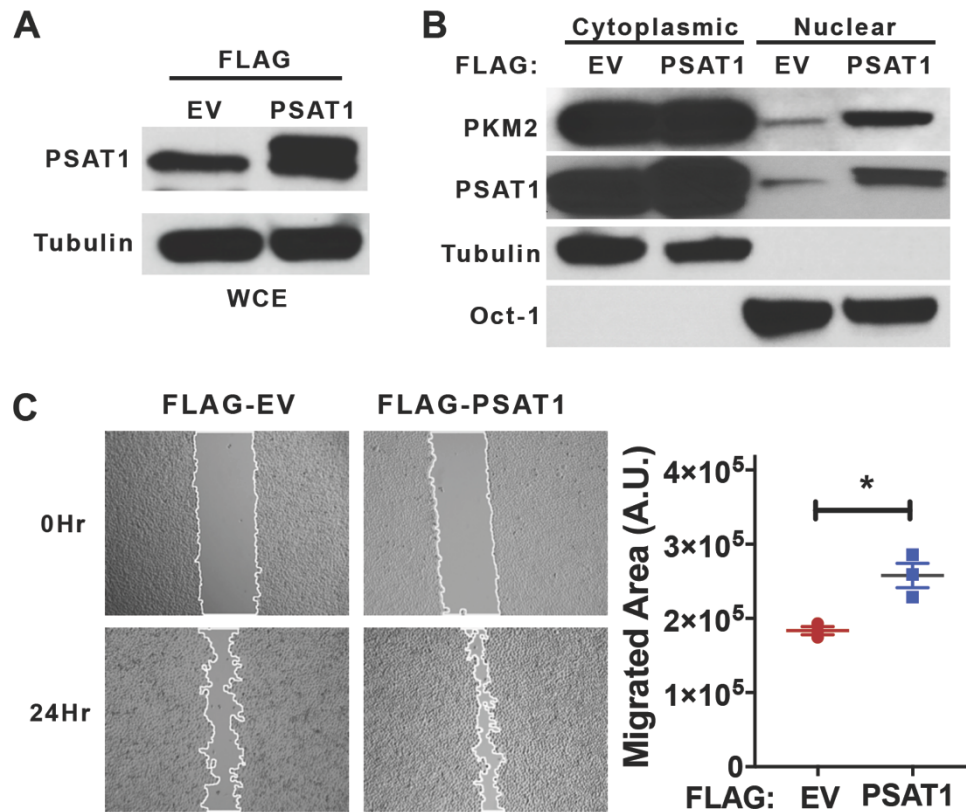

**Supplemental Figure S2. Ectopic expression of PSAT1 induces PKM2 nuclear localization and cell migration in PC9 cells.** A) Immunoblot analysis of FLAG-PSAT1 expression in PC9 cells. Endogenous and tagged PSAT1 was analyzed using anti-PSAT1 antibody in lysates from PC9 cells expressing empty vector (FLAG-EV) or vector encoding FLAG-PSAT1. Tubulin expression was used for loading control. Shown are representative images from three independent experiments. B) PKM2 and PSAT1 localization in PC9 cells ectopically expressing empty vector (FLAG-EV) or FLAG-PSAT1. Cytoplasmic and nuclear fractions from FLAG-EV and FLAG-PSAT1 expressing cells were analyzed using anti-PKM2 or anti-PSAT1 antibodies. Oct-1 and  $\alpha$ -tubulin served as loading controls for nuclear and cytoplasmic compartments, respectively. Shown are representative images from three independent experiments. C) Wound healing assay of serum-starved PC9 cells expressing FLAG-EV or FLAG-PSAT1. Shown are representative images at 0 hr and 24 hr with migrating cells demarcated by continuous white lines. Data is presented as mean  $\pm$  SE migrated area after 24 hours from three independent experiments. Statistical significance was determined by paired t-test analysis. \*,  $p < 0.05$ . EV: Empty Vector. A.U.: arbitrary unit.

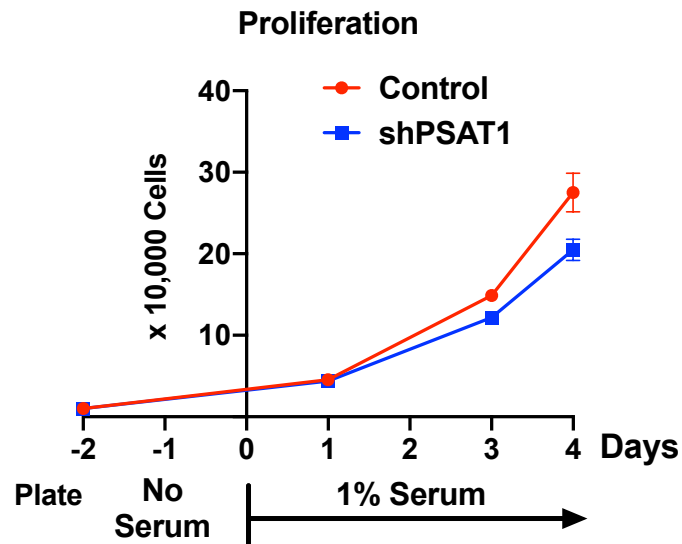

**Supplemental Figure S3. Stable PSAT1 suppression does not impact PC9 cell proliferation under medium conditions and timing used within cell migration assays.** PC9 cells (plated at low density -10,000 cells) were serum-starved for 24-hours prior to addition of 1% serum. Proliferation was monitored by cell enumeration at the indicated time points. Shown are mean  $\pm$  SE from two independent experiments. No effect on cell proliferation was observed at 24 hours and PSAT1 loss had moderate impact at three and four days.

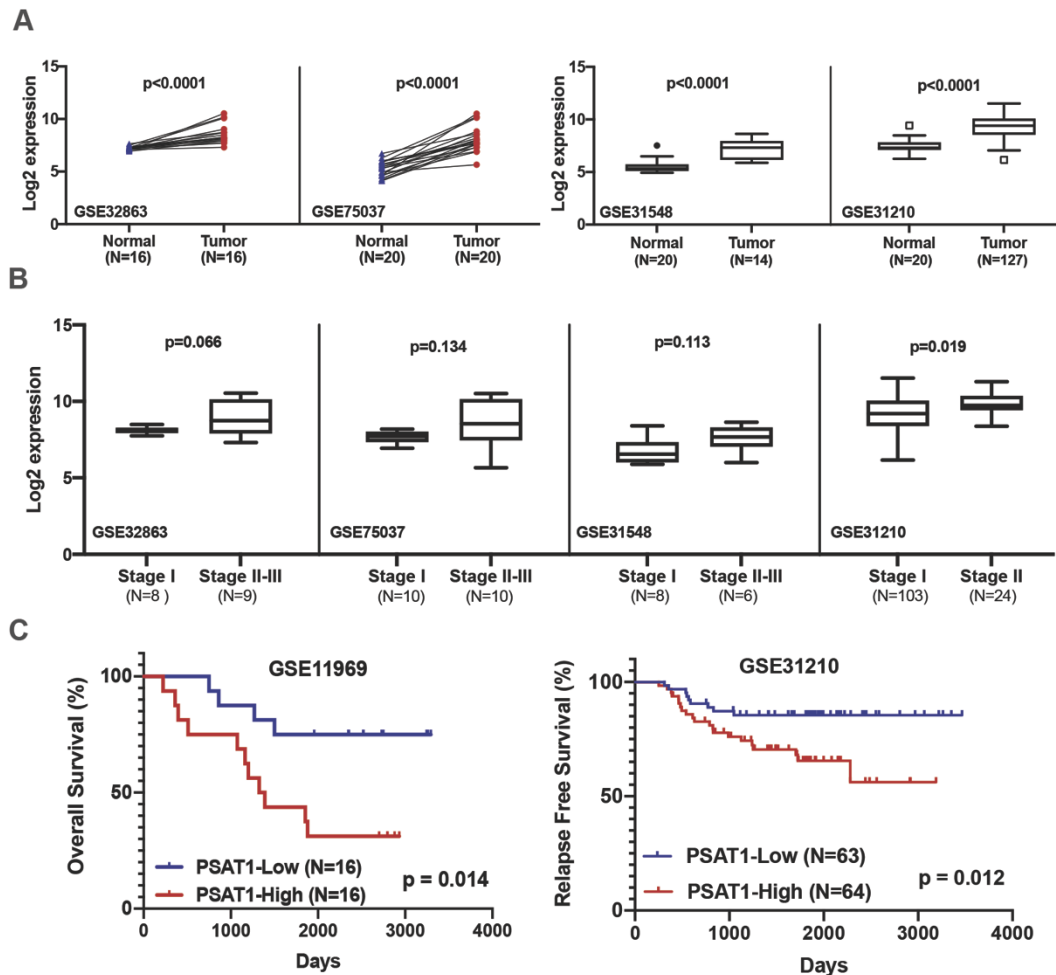

**Supplemental Figure S4. *PSAT1* is elevated in EGFR-mutant NSCLC compared to normal lung and correlates with poorer patient outcomes.** A) Expression analysis of *PSAT1* in EGFR mutant lung tumors compared with paired (GSE32863 and GSE75037) and unpaired (GSE31548 and GSE31210) normal lung tissue. Statistical significance were determined by paired and unpaired t-test, respectively. B) Expression analysis of *PSAT1* in late-stage (Stage II and/ or Stage III) compared with early-stage (Stage I) EGFR mutant lung tumor. Statistical significance were determined by unpaired t-test. C) Kaplan-Meier analysis for *PSAT1* expression with overall survival [Hazard Ratio = 3.77 (1.35 – 10.52)] and relapse-free survival [Hazard Ratio = 2.615 (1.28 – 5.36)] in EGFR-mutant lung cancer patients. *p* values are indicated for each comparison.

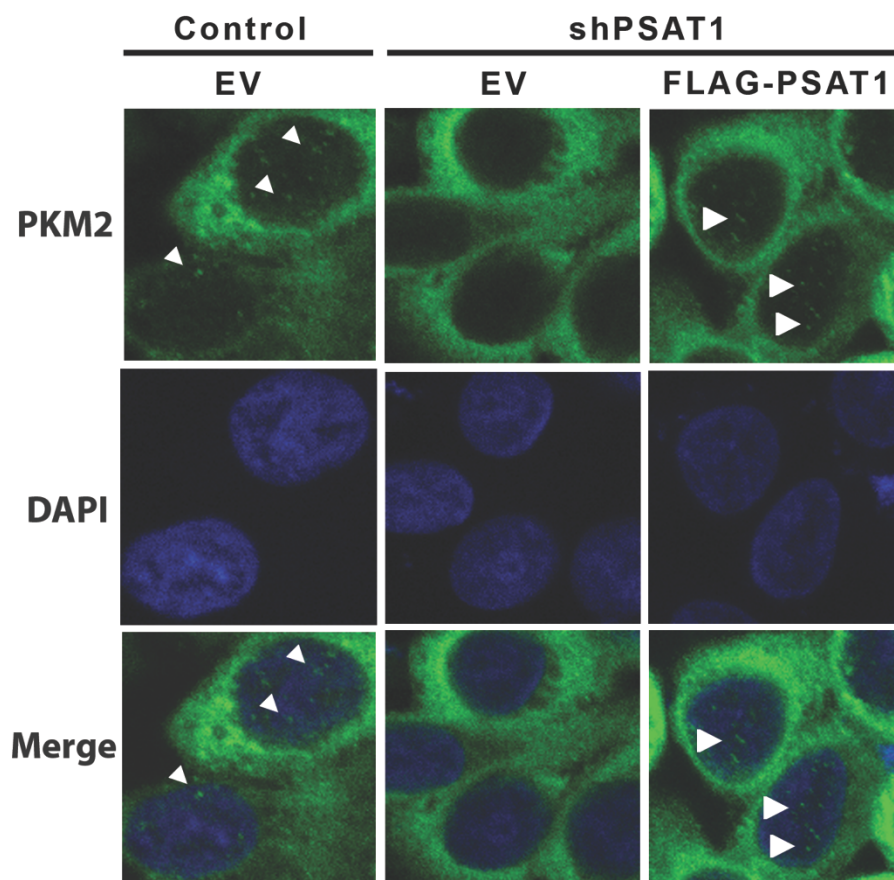

**Supplemental Figure S5. PSAT1 loss abrogates nuclear PKM2 expression, which is rescued upon PSAT1 restoration.** Immunofluorescence analysis of PKM2 localization in either Control PC9 cells or PSAT1-depleted cells stably expressing either empty vector (EV) or FLAG-PSAT1. Analysis was performed using anti-PKM2 primary antibody followed by AlexaFluor 488-conjugated secondary. DAPI served as a control for nuclear staining. Arrowheads indicate nuclear PKM2 staining in representative images from three independent experiments.

| Primer ID                                          | Sequence (5'-3')                                                                                                             | Mutagenesis Kit                        |
|----------------------------------------------------|------------------------------------------------------------------------------------------------------------------------------|----------------------------------------|
| MT1-PKM2-F<br>MT1-PKM2-R                           | CAGAGGCTGCCATCTACCAC <b><u>AGCA</u></b> AATTATTTGAGGAACTCCGC<br>GCGGAGTTCCTCAAATAATT <b><u>TCCT</u></b> GTGGTAGATGGCAGCCTCTG | QuikChange<br>mutagenesis<br>XL kit    |
| MT2-PKM2-F<br>MT2-PKM2-R                           | CTCCGCCGCCTGGCG <b><u>AGCCA</u></b> TACCAGCGACCCAC<br>GTGGGGTCGCTGGTA <b><u>TGGCT</u></b> CGCCAGGCGGCGGAG                    |                                        |
| MT3-PKM2-F<br>MT3-PKM2-R                           | <b><u>GCGAGCCAT</u></b> ACCAGCGACCCACAGAA<br><b><u>CAGGCGGAC</u></b> GAGTTCCTCAAATAATTGCAAGTGGTAG                            | Q5<br>Site-<br>Directed<br>Mutagenesis |
| MT4-PKM2-F<br>MT4-PKM2-R                           | TGAGGAACTC <b><u>GTCC</u></b> CGCCTGGCGC<br>AATAATTGCAAGTGGTAGATGGC                                                          |                                        |
| K433Q-PKM2-F<br>K433Q-PKM2-R                       | CGTCCTCACC <b><u>C</u></b> AGTCTGGCAG<br>ATTATGGCCCCACTGCAG                                                                  |                                        |
| shRNA-resistant-PSAT1-F<br>shRNA-resistant-PSAT1-R | <b><u>TACT</u></b> GTTAGAGATACAAAAGGAATTATTAGACTACAAAGGAGTTGGCATTAG<br><b><u>CAC</u></b> TGTGCGGCAGCTTGGCGGG                 |                                        |

**Supplemental Table S1: PCR primers for PKM2 site-directed mutagenesis.** Point mutations are indicated in bold letters and underlined.
